# Supplementary material for: Simplistic one-pot synthesis of an inorganic–organic cubic caged material: a new interface for detecting toxic bisphenol-A electrochemically
Source: Royal Society of Chemistry journal article supplement (doi:10.1039/d0nj05142j), 2020-01-01

**SIMPLISTIC ONE-POT SYNTHESIS OF INORGANIC-ORGANIC  
CUBICAL CAGED MATERIAL: A NEW INTERFACE FOR  
DETECTING TOXIC BISPHENOL-A ELECTROCHEMICALLY**

**Supporting Information**

*Dhurkasini Anathakrishnan<sup>1,2</sup>, Harikrishnan Venkatesvaran<sup>1</sup>, Aarthi Kannan<sup>1</sup>, Sakthivel  
Gandhi<sup>\*1,2</sup>*

<sup>1</sup>School of Chemical and Biotechnology, SASTRA Deemed to be University, Thanjavur  
613401, Tamil Nadu

<sup>2</sup>Centre for Nanotechnology and Advanced Biomaterials, SASTRA Deemed to be University,  
Thanjavur 613401, Tamil Nadu

**Figure: S1. Nuclear magnetic resonance spectra of POSS-OH (A), POSS-SH (B) POSS-Vinyl (C) respectively**

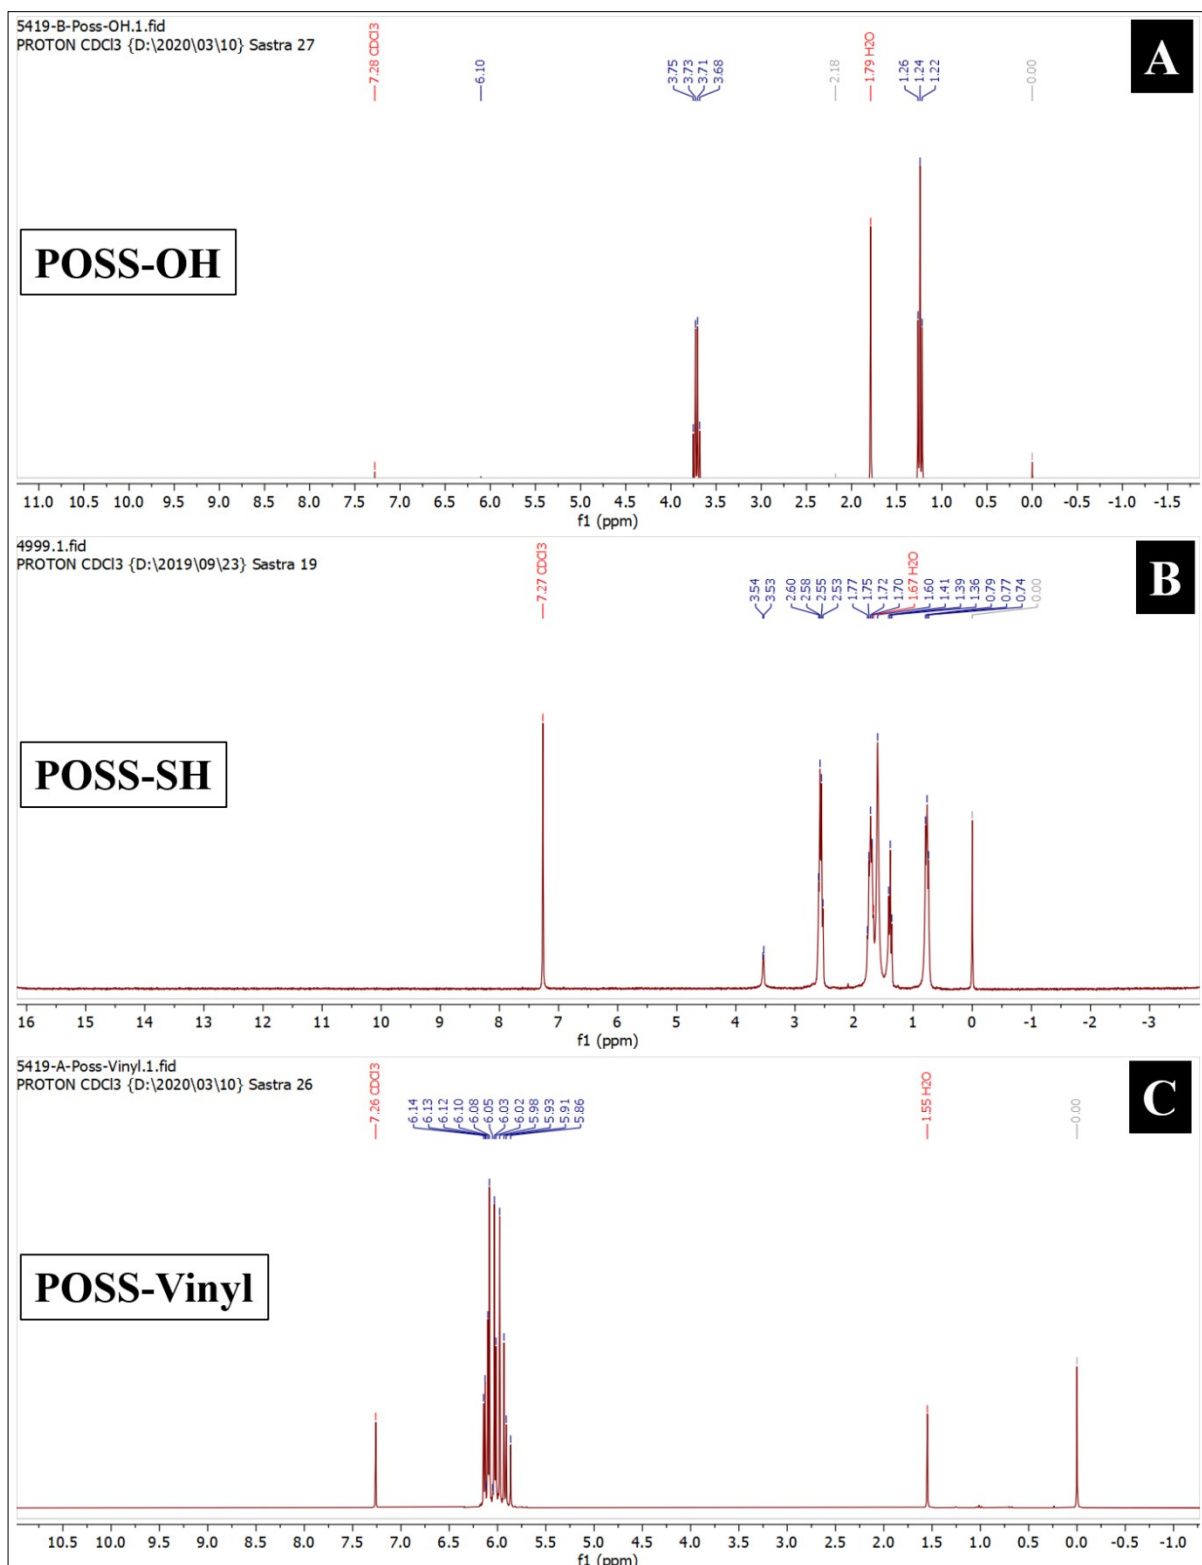

Figure: S2.N<sub>2</sub> adsorption-desorption isothermal analysis (BET) of POSS-Vinyl hybrid material

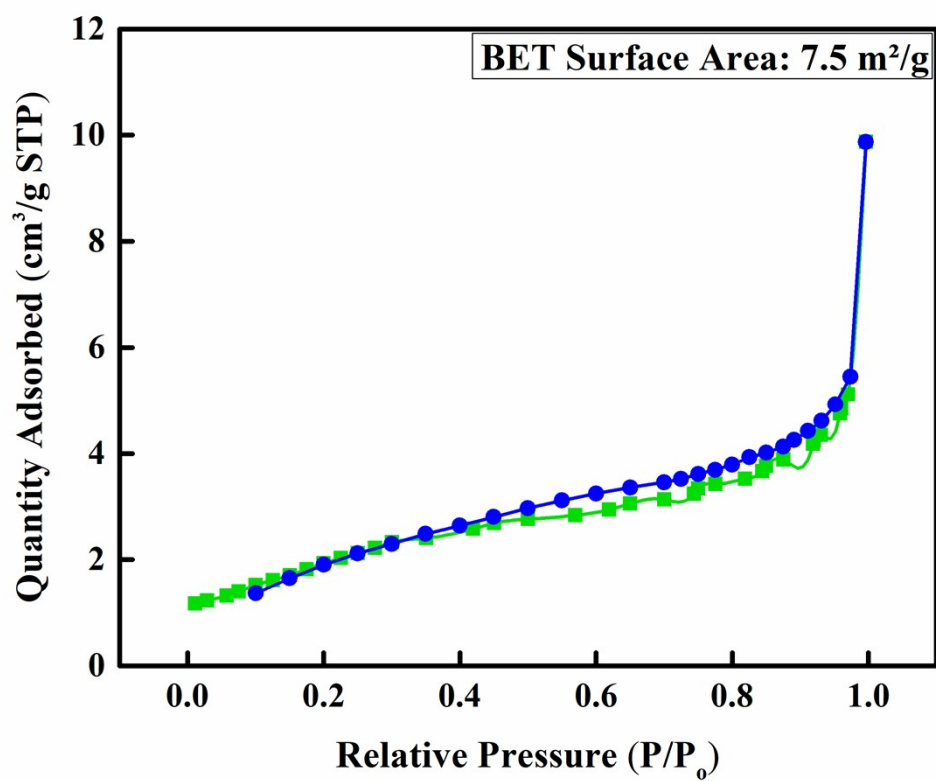

**Figure: S3. The scan rate studies for POSS-OH (A&D), POSS-SH (B&E) and POSS-Vinyl (C&F) using cyclic voltammetry in phosphate buffer solution (pH=7) and the scan rate study ranges from 10 to 100mVs<sup>-1</sup>**

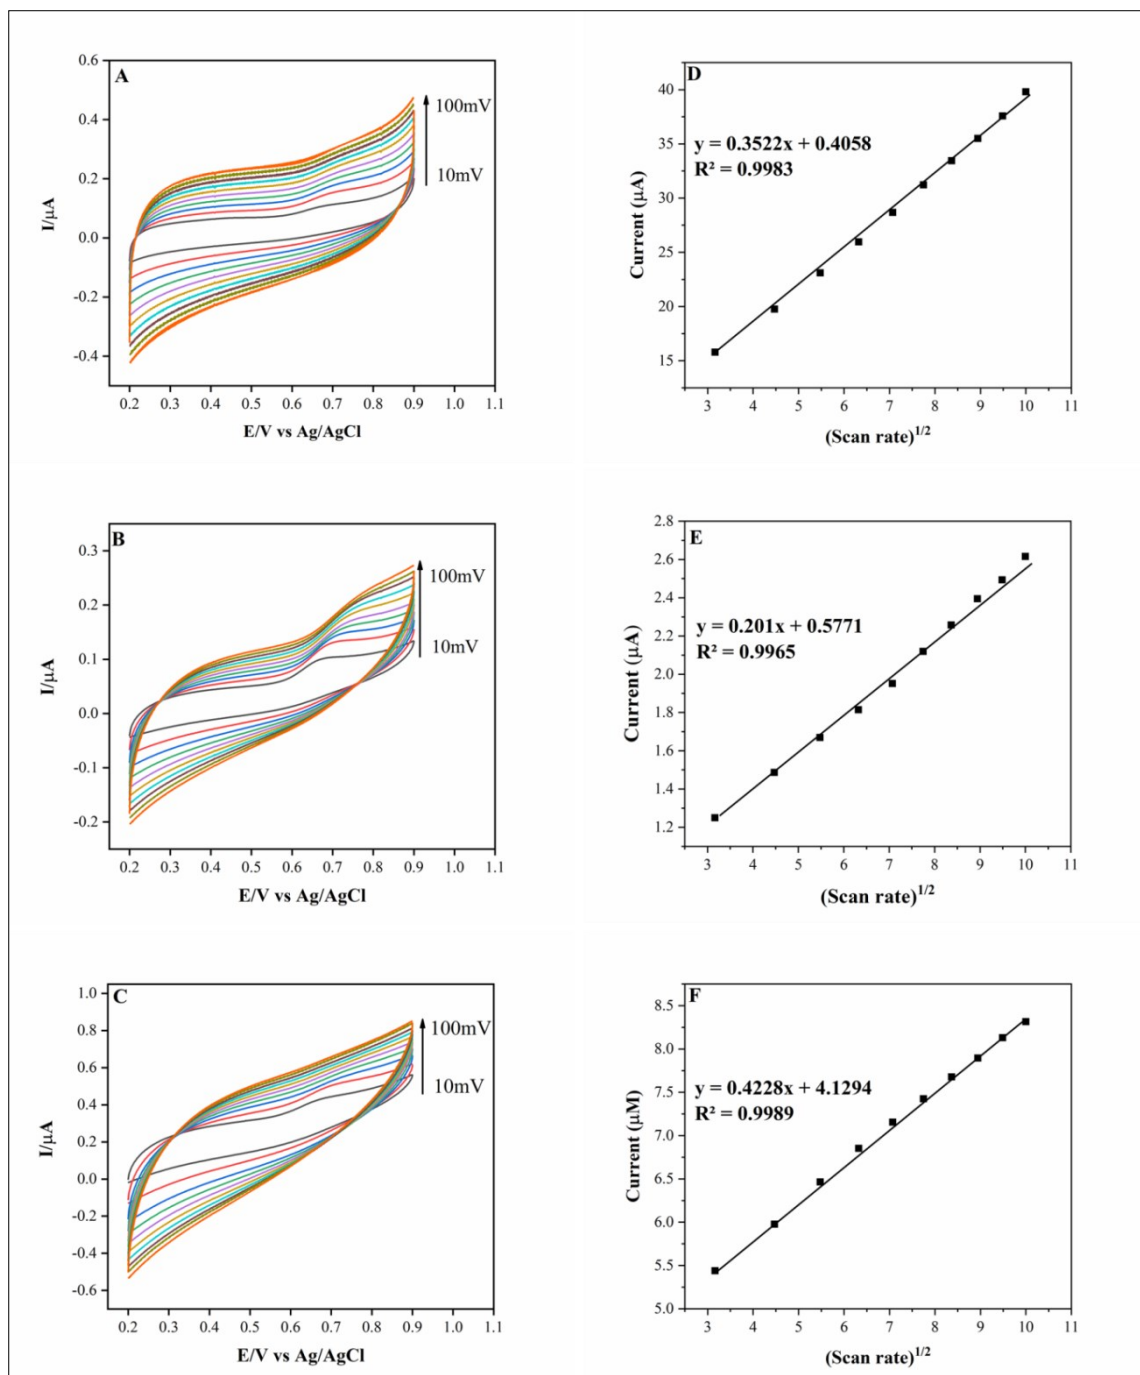

Figure: S4. Cyclic voltammograms of bare GCE & POSS-Vinyl @GCE in 5.0 mM  $K_3[Fe(CN)_6]$

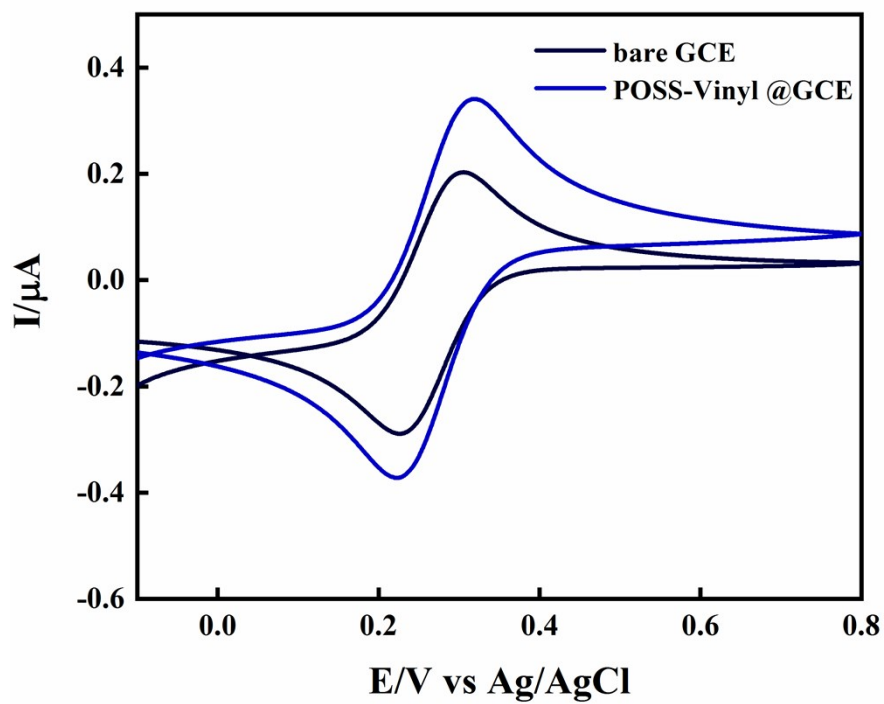

**Figure: S5. DPV response of 5  $\mu$ M BPA in the presence of interferents over POSS-Vinyl @GCE**

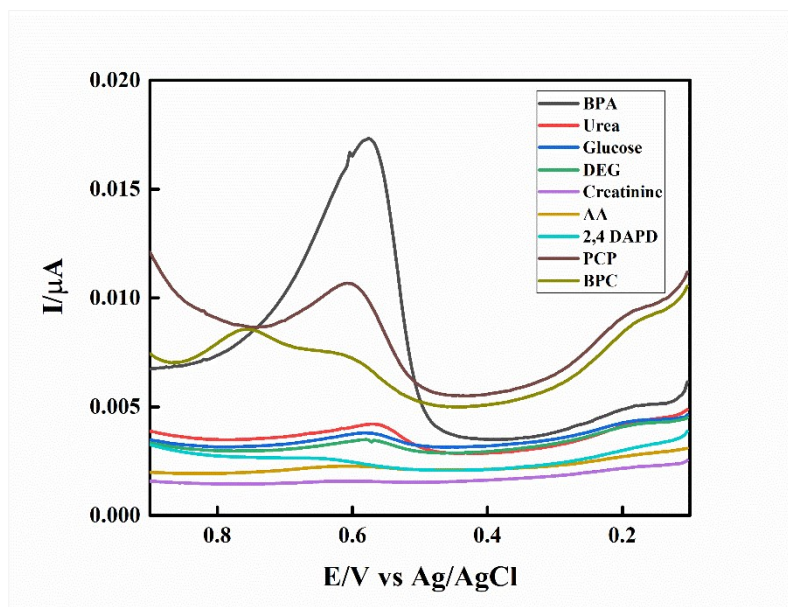

**Figure: S6. Real sample analysis of BPA in drinking water (A) and tap water (B).**

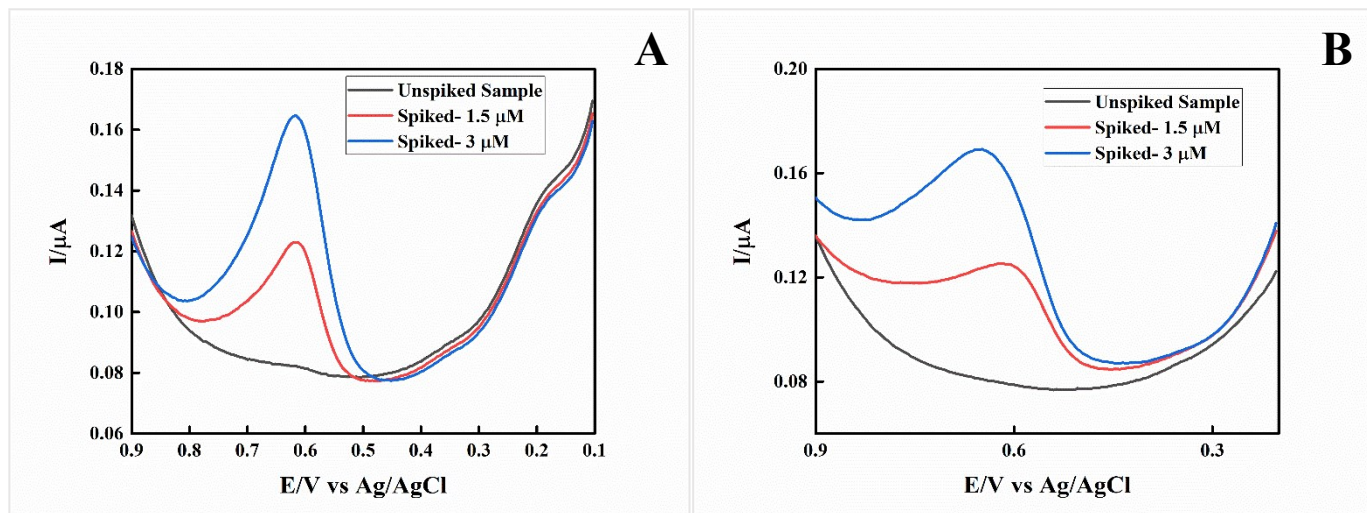

Supplement: d0nj05142j1.pdf [file d0nj05142j1.pdf]
